# Supplementary material
Source: publisher figshare collection journal article supplement (https://acs.figshare.com/ndownloader/files/5701062)
Supplement: Supplementary file 1 [file 5701062]

#==========================================
# cif file for "sonday" (compound 2a in the manuscript).
#==========================================

data_sonday

_audit_creation_method            SHELXL-97
_chemical_name_systematic
;
 ?
;
_chemical_name_common             ?
_chemical_melting_point           ?
_chemical_formula_moiety          ?
_chemical_formula_sum
 'C24 H24 N2 O2 Pt S2'
_chemical_formula_weight          631.66

loop_
 _atom_type_symbol
 _atom_type_description
 _atom_type_scat_dispersion_real
 _atom_type_scat_dispersion_imag
 _atom_type_scat_source
 'C'  'C'   0.0033   0.0016
 'International Tables Vol C Tables 4.2.6.8 and 6.1.1.4'
 'H'  'H'   0.0000   0.0000
 'International Tables Vol C Tables 4.2.6.8 and 6.1.1.4'
 'N'  'N'   0.0061   0.0033
 'International Tables Vol C Tables 4.2.6.8 and 6.1.1.4'
 'O'  'O'   0.0106   0.0060
 'International Tables Vol C Tables 4.2.6.8 and 6.1.1.4'
 'S'  'S'   0.1246   0.1234
 'International Tables Vol C Tables 4.2.6.8 and 6.1.1.4'
 'Pt'  'Pt'  -1.7033   8.3905
 'International Tables Vol C Tables 4.2.6.8 and 6.1.1.4'

_symmetry_cell_setting            triclinic
_symmetry_space_group_name_H-M    'P -1'

loop_
 _symmetry_equiv_pos_as_xyz
 'x, y, z'
 '-x, -y, -z'

_cell_length_a                    9.5174(6)
_cell_length_b                    11.3869(6)
_cell_length_c                    12.1696(8)
_cell_angle_alpha                 70.409(3)
_cell_angle_beta                  76.920(3)
_cell_angle_gamma                 74.938(3)
_cell_volume                      1185.71(12)
_cell_formula_units_Z             2
_cell_measurement_temperature     143(2)
_cell_measurement_reflns_used     7089
_cell_measurement_theta_min       2
_cell_measurement_theta_max       28

_exptl_crystal_description        tablet
_exptl_crystal_colour             yellow
_exptl_crystal_size_max           0.20
_exptl_crystal_size_mid           0.20
_exptl_crystal_size_min           0.11
_exptl_crystal_density_meas       ?
_exptl_crystal_density_diffrn     1.769
_exptl_crystal_density_method     'not measured'
_exptl_crystal_F_000              616
_exptl_absorpt_coefficient_mu     6.116
_exptl_absorpt_correction_type    numerical
_exptl_absorpt_correction_T_min  0.2686
_exptl_absorpt_correction_T_max  0.5667
_exptl_absorpt_process_details    XPREP

loop_
 _exptl_crystal_face_index_h
 _exptl_crystal_face_index_k
 _exptl_crystal_face_index_l
 _exptl_crystal_face_perp_dist
    0.00    1.00    0.00    0.0950
    0.00   -1.00    0.00    0.0950
    0.00    0.00    1.00    0.0440
    0.00    0.00   -1.00    0.0640
   -1.00   -1.00   -1.00    0.0900
    1.00    1.00    1.00    0.0930
   -2.00    1.00    1.00    0.1370
    0.00   -1.00   -2.00    0.0820

_exptl_special_details
;
 ?
;

_diffrn_ambient_temperature       143(2)
_diffrn_radiation_wavelength      0.71073
_diffrn_radiation_type            MoK\a
_diffrn_radiation_source          'fine-focus sealed tube'
_diffrn_radiation_monochromator   graphite
_diffrn_measurement_device_type   'Bruker SMART 1000 CCD'
_diffrn_measurement_method        '\w- and \f-scan'
_diffrn_detector_area_resol_mean  8.192
_diffrn_standards_number          ?
_diffrn_standards_interval_count  ?
_diffrn_standards_interval_time   ?
_diffrn_standards_decay_%         ?
_diffrn_reflns_number             19060
_diffrn_reflns_av_R_equivalents   0.0499
_diffrn_reflns_av_sigmaI/netI     0.0383
_diffrn_reflns_limit_h_min        -13
_diffrn_reflns_limit_h_max        13
_diffrn_reflns_limit_k_min        -16
_diffrn_reflns_limit_k_max        16
_diffrn_reflns_limit_l_min        -17
_diffrn_reflns_limit_l_max        17
_diffrn_reflns_theta_min          1.80
_diffrn_reflns_theta_max          30.03
_reflns_number_total              6876
_reflns_number_gt                 6374
_reflns_threshold_expression      >2sigma(I)

_computing_data_collection        'Bruker SMART'
_computing_cell_refinement        'Bruker SAINT'
_computing_data_reduction         'Bruker SAINT'
_computing_structure_solution     'SHELXS-97 (Sheldrick, 1990)'
_computing_structure_refinement   'SHELXL-97 (Sheldrick, 1997)'
_computing_molecular_graphics     'Siemens XP'
_computing_publication_material   SHELXL-97

_refine_special_details
;
 Refinement of F^2^ against ALL reflections.  The weighted R-factor wR and
 goodness of fit S are based on F^2^, conventional R-factors R are based
 on F, with F set to zero for negative F^2^. The threshold expression of
 F^2^ > 2sigma(F^2^) is used only for calculating R-factors(gt) etc. and is
 not relevant to the choice of reflections for refinement.  R-factors based
 on F^2^ are statistically about twice as large as those based on F, and R-
 factors based on ALL data will be even larger.
;

_refine_ls_structure_factor_coef  Fsqd
_refine_ls_matrix_type            full
_refine_ls_weighting_scheme       calc
_refine_ls_weighting_details
 'calc w=1/[\s^2^(Fo^2^)+(0.0227P)^2^] where P=(Fo^2^+2Fc^2^)/3'
_atom_sites_solution_primary      Patterson
_atom_sites_solution_secondary    difmap
_atom_sites_solution_hydrogens    geom
_refine_ls_hydrogen_treatment     'rigid methyls, others riding'
_refine_ls_extinction_method      none
_refine_ls_extinction_coef        ?
_refine_ls_number_reflns          6876
_refine_ls_number_parameters      286
_refine_ls_number_restraints      78
_refine_ls_R_factor_all           0.0248
_refine_ls_R_factor_gt            0.0211
_refine_ls_wR_factor_ref          0.0427
_refine_ls_wR_factor_gt           0.0418
_refine_ls_goodness_of_fit_ref    1.002
_refine_ls_restrained_S_all       0.996
_refine_ls_shift/su_max           0.004
_refine_ls_shift/su_mean          0.000

loop_
 _atom_site_label
 _atom_site_type_symbol
 _atom_site_fract_x
 _atom_site_fract_y
 _atom_site_fract_z
 _atom_site_U_iso_or_equiv
 _atom_site_adp_type
 _atom_site_occupancy
 _atom_site_symmetry_multiplicity
 _atom_site_calc_flag
 _atom_site_refinement_flags
 _atom_site_disorder_assembly
 _atom_site_disorder_group
Pt Pt 0.403600(8) 0.630342(6) 0.585941(6) 0.02134(3) Uani 1 1 d . . .
S1 S 0.26055(5) 0.54252(5) 0.75938(4) 0.02234(9) Uani 1 1 d . . .
S2 S 0.56981(6) 0.48742(5) 0.70453(4) 0.02560(10) Uani 1 1 d . . .
O1 O 0.3423(2) 0.22321(16) 1.09951(15) 0.0416(4) Uani 1 1 d U . .
O2 O 0.67022(19) 0.23071(19) 0.89192(16) 0.0422(4) Uani 1 1 d U . .
N1 N 0.1251(2) 0.79813(16) 0.47870(15) 0.0274(4) Uani 1 1 d U . .
N2 N 0.6367(2) 0.72657(16) 0.37108(15) 0.0262(4) Uani 1 1 d U . .
C1 C 0.4202(2) 0.44660(18) 0.81543(16) 0.0206(4) Uani 1 1 d U . .
C2 C 0.4331(2) 0.35843(18) 0.92304(17) 0.0213(4) Uani 1 1 d U . .
C3 C 0.3135(2) 0.31728(19) 1.01671(18) 0.0269(4) Uani 1 1 d U . .
C4 C 0.1561(3) 0.3872(2) 1.0136(2) 0.0383(5) Uani 1 1 d U . .
H4A H 0.1227 0.3838 0.9444 0.046 Uiso 1 1 calc R . .
H4B H 0.1491 0.4761 1.0088 0.046 Uiso 1 1 calc R . .
H4C H 0.0940 0.3471 1.0854 0.046 Uiso 1 1 calc R . .
C5 C 0.5838(2) 0.28995(18) 0.95235(18) 0.0239(4) Uani 1 1 d U . .
C6 C 0.6258(4) 0.2983(3) 1.0602(3) 0.0622(10) Uani 1 1 d U . .
H6A H 0.6744 0.2138 1.1042 0.075 Uiso 1 1 calc R . .
H6B H 0.5373 0.3291 1.1101 0.075 Uiso 1 1 calc R . .
H6C H 0.6934 0.3573 1.0369 0.075 Uiso 1 1 calc R . .
C10 C 0.2329(3) 0.73768(19) 0.51228(18) 0.0271(4) Uani 1 1 d U . .
C11 C -0.0091(2) 0.87451(18) 0.44642(17) 0.0245(4) Uani 1 1 d DU . .
C12 C -0.1377(3) 0.8528(2) 0.5255(2) 0.0328(5) Uani 1 1 d DU . .
C13 C -0.2685(3) 0.9321(3) 0.4907(2) 0.0402(6) Uani 1 1 d DU . .
H13 H -0.3588 0.9201 0.5414 0.048 Uiso 1 1 calc R . .
C14 C -0.2705(3) 1.0273(2) 0.3851(3) 0.0396(6) Uani 1 1 d DU . .
H14 H -0.3612 1.0807 0.3643 0.048 Uiso 1 1 calc R . .
C15 C -0.1400(3) 1.0452(2) 0.3092(2) 0.0322(5) Uani 1 1 d DU . .
H15 H -0.1424 1.1108 0.2363 0.039 Uiso 1 1 calc R . .
C16 C -0.0062(2) 0.96903(19) 0.33778(18) 0.0238(4) Uani 1 1 d DU . .
C17 C -0.1342(4) 0.7497(3) 0.6415(2) 0.0530(8) Uani 1 1 d U . .
H17A H -0.1192 0.6668 0.6281 0.079 Uiso 1 1 calc R . .
H17B H -0.2278 0.7644 0.6936 0.079 Uiso 1 1 calc R . .
H17C H -0.0534 0.7506 0.6786 0.079 Uiso 1 1 calc R . .
C18 C 0.1365(3) 0.9853(2) 0.25696(19) 0.0308(4) Uani 1 1 d U . .
H18A H 0.2060 0.9960 0.2995 0.037 Uiso 1 1 calc R . .
H18B H 0.1190 1.0606 0.1890 0.037 Uiso 1 1 calc R . .
H18C H 0.1777 0.9098 0.2296 0.037 Uiso 1 1 calc R . .
C20 C 0.5492(3) 0.69122(19) 0.44967(18) 0.0268(4) Uani 1 1 d U . .
C21 C 0.7399(2) 0.76955(17) 0.27380(17) 0.0214(4) Uani 1 1 d DU . .
C22 C 0.8877(2) 0.70961(19) 0.27704(19) 0.0272(4) Uani 1 1 d DU . .
C23 C 0.9883(3) 0.7538(2) 0.1790(2) 0.0372(5) Uani 1 1 d DU . .
H23 H 1.0897 0.7153 0.1776 0.045 Uiso 1 1 calc R . .
C24 C 0.9432(3) 0.8529(2) 0.0837(2) 0.0390(5) Uani 1 1 d DU . .
H24 H 1.0140 0.8819 0.0176 0.047 Uiso 1 1 calc R . .
C25 C 0.7959(3) 0.9107(2) 0.08324(19) 0.0339(5) Uani 1 1 d DU . .
H25 H 0.7669 0.9787 0.0166 0.041 Uiso 1 1 calc R . .
C26 C 0.6899(2) 0.87067(18) 0.17901(18) 0.0241(4) Uani 1 1 d DU . .
C27 C 0.9341(3) 0.6022(2) 0.3817(2) 0.0399(6) Uani 1 1 d U . .
H27A H 1.0418 0.5797 0.3725 0.048 Uiso 1 1 calc R . .
H27B H 0.8953 0.5283 0.3874 0.048 Uiso 1 1 calc R . .
H27C H 0.8956 0.6283 0.4535 0.048 Uiso 1 1 calc R . .
C28 C 0.5298(3) 0.9317(2) 0.1833(2) 0.0364(5) Uani 1 1 d U . .
H28A H 0.4964 0.9639 0.2521 0.044 Uiso 1 1 calc R . .
H28B H 0.4729 0.8687 0.1895 0.044 Uiso 1 1 calc R . .
H28C H 0.5153 1.0023 0.1112 0.044 Uiso 1 1 calc R . .

loop_
 _atom_site_aniso_label
 _atom_site_aniso_U_11
 _atom_site_aniso_U_22
 _atom_site_aniso_U_33
 _atom_site_aniso_U_23
 _atom_site_aniso_U_13
 _atom_site_aniso_U_12
Pt 0.02587(5) 0.02061(4) 0.01531(4) -0.00115(3) -0.00229(3) -0.00705(3)
S1 0.0188(2) 0.0256(2) 0.0180(2) -0.00028(17) -0.00335(17) -0.00422(17)
S2 0.0200(2) 0.0307(2) 0.0202(2) -0.00098(18) -0.00009(18) -0.00634(19)
O1 0.0419(10) 0.0309(8) 0.0293(8) 0.0051(6) 0.0061(7) 0.0024(7)
O2 0.0224(8) 0.0606(11) 0.0445(10) -0.0271(9) -0.0050(7) 0.0056(8)
N1 0.0362(11) 0.0243(8) 0.0205(8) -0.0045(6) -0.0074(8) -0.0042(7)
N2 0.0325(10) 0.0236(8) 0.0215(8) -0.0045(6) -0.0009(7) -0.0095(7)
C1 0.0181(9) 0.0238(9) 0.0187(8) -0.0048(7) -0.0014(7) -0.0054(7)
C2 0.0176(9) 0.0235(9) 0.0202(8) -0.0054(7) -0.0010(7) -0.0027(7)
C3 0.0290(11) 0.0250(9) 0.0200(9) -0.0025(7) 0.0001(8) -0.0028(8)
C4 0.0235(11) 0.0458(13) 0.0294(11) 0.0031(10) 0.0040(9) -0.0049(9)
C5 0.0240(10) 0.0215(9) 0.0241(9) -0.0033(7) -0.0063(8) -0.0033(7)
C6 0.0541(19) 0.077(2) 0.072(2) -0.0499(18) -0.0437(17) 0.0261(16)
C10 0.0387(12) 0.0228(9) 0.0180(9) -0.0026(7) -0.0035(8) -0.0086(8)
C11 0.0285(11) 0.0242(9) 0.0208(9) -0.0077(7) -0.0035(8) -0.0040(7)
C12 0.0396(13) 0.0322(11) 0.0296(11) -0.0167(9) 0.0081(9) -0.0139(9)
C13 0.0291(12) 0.0480(14) 0.0506(15) -0.0305(12) 0.0108(11) -0.0130(10)
C14 0.0259(12) 0.0436(13) 0.0559(16) -0.0266(12) -0.0097(11) 0.0009(10)
C15 0.0314(12) 0.0306(11) 0.0339(11) -0.0086(9) -0.0128(10) 0.0004(9)
C16 0.0262(10) 0.0229(9) 0.0223(9) -0.0072(7) -0.0053(8) -0.0027(7)
C17 0.082(2) 0.0405(14) 0.0280(12) -0.0104(10) 0.0190(13) -0.0212(14)
C18 0.0302(12) 0.0332(11) 0.0242(10) -0.0058(8) 0.0014(9) -0.0066(9)
C20 0.0364(12) 0.0212(9) 0.0197(9) -0.0011(7) -0.0039(8) -0.0075(8)
C21 0.0231(10) 0.0214(8) 0.0193(8) -0.0040(7) -0.0020(7) -0.0075(7)
C22 0.0278(11) 0.0240(9) 0.0305(10) -0.0058(8) -0.0110(9) -0.0038(8)
C23 0.0219(11) 0.0410(12) 0.0513(15) -0.0187(11) -0.0007(10) -0.0081(9)
C24 0.0372(13) 0.0418(13) 0.0354(12) -0.0114(10) 0.0128(10) -0.0193(10)
C25 0.0475(14) 0.0288(10) 0.0211(9) 0.0003(8) -0.0017(9) -0.0135(9)
C26 0.0271(10) 0.0220(9) 0.0215(9) -0.0024(7) -0.0056(8) -0.0058(7)
C27 0.0478(16) 0.0284(11) 0.0456(14) -0.0053(10) -0.0298(12) 0.0008(10)
C28 0.0312(12) 0.0306(11) 0.0437(14) -0.0060(10) -0.0138(10) 0.0008(9)

_geom_special_details
;
 All esds (except the esd in the dihedral angle between two l.s. planes)
 are estimated using the full covariance matrix.  The cell esds are taken
 into account individually in the estimation of esds in distances, angles
 and torsion angles; correlations between esds in cell parameters are only
 used when they are defined by crystal symmetry.  An approximate (isotropic)
 treatment of cell esds is used for estimating esds involving l.s. planes.
;

loop_
 _geom_bond_atom_site_label_1
 _geom_bond_atom_site_label_2
 _geom_bond_distance
 _geom_bond_site_symmetry_2
 _geom_bond_publ_flag
Pt C10 1.957(2) . ?
Pt C20 1.959(2) . ?
Pt S1 2.3022(5) . ?
Pt S2 2.3139(5) . ?
S1 C1 1.7536(19) . ?
S2 C1 1.766(2) . ?
O1 C3 1.219(2) . ?
O2 C5 1.201(3) . ?
N1 C10 1.152(3) . ?
N1 C11 1.401(3) . ?
N2 C20 1.151(3) . ?
N2 C21 1.393(3) . ?
C1 C2 1.366(3) . ?
C2 C3 1.465(3) . ?
C2 C5 1.502(3) . ?
C3 C4 1.505(3) . ?
C5 C6 1.493(3) . ?
C11 C12 1.396(3) . ?
C11 C16 1.397(3) . ?
C12 C13 1.393(4) . ?
C12 C17 1.505(3) . ?
C13 C14 1.376(4) . ?
C14 C15 1.387(4) . ?
C15 C16 1.386(3) . ?
C16 C18 1.500(3) . ?
C21 C22 1.398(3) . ?
C21 C26 1.399(3) . ?
C22 C23 1.387(3) . ?
C22 C27 1.497(3) . ?
C23 C24 1.378(4) . ?
C24 C25 1.387(4) . ?
C25 C26 1.391(3) . ?
C26 C28 1.498(3) . ?

loop_
 _geom_angle_atom_site_label_1
 _geom_angle_atom_site_label_2
 _geom_angle_atom_site_label_3
 _geom_angle
 _geom_angle_site_symmetry_1
 _geom_angle_site_symmetry_3
 _geom_angle_publ_flag
C10 Pt C20 94.93(9) . . ?
C10 Pt S1 93.14(6) . . ?
C20 Pt S1 171.91(6) . . ?
C10 Pt S2 168.32(6) . . ?
C20 Pt S2 96.73(6) . . ?
S1 Pt S2 75.210(18) . . ?
C1 S1 Pt 89.55(7) . . ?
C1 S2 Pt 88.88(6) . . ?
C10 N1 C11 175.3(2) . . ?
C20 N2 C21 178.4(2) . . ?
C2 C1 S1 128.93(16) . . ?
C2 C1 S2 124.72(15) . . ?
S1 C1 S2 106.34(10) . . ?
C1 C2 C3 127.23(18) . . ?
C1 C2 C5 119.15(18) . . ?
C3 C2 C5 113.59(17) . . ?
O1 C3 C2 119.0(2) . . ?
O1 C3 C4 119.0(2) . . ?
C2 C3 C4 122.03(18) . . ?
O2 C5 C6 119.8(2) . . ?
O2 C5 C2 122.31(18) . . ?
C6 C5 C2 117.9(2) . . ?
N1 C10 Pt 173.94(19) . . ?
C12 C11 C16 123.9(2) . . ?
C12 C11 N1 118.04(19) . . ?
C16 C11 N1 118.07(19) . . ?
C13 C12 C11 116.2(2) . . ?
C13 C12 C17 122.2(2) . . ?
C11 C12 C17 121.6(2) . . ?
C14 C13 C12 121.9(2) . . ?
C13 C14 C15 119.9(2) . . ?
C16 C15 C14 121.2(2) . . ?
C15 C16 C11 116.9(2) . . ?
C15 C16 C18 122.4(2) . . ?
C11 C16 C18 120.68(19) . . ?
N2 C20 Pt 178.66(19) . . ?
N2 C21 C22 118.04(17) . . ?
N2 C21 C26 118.12(18) . . ?
C22 C21 C26 123.84(19) . . ?
C23 C22 C21 116.9(2) . . ?
C23 C22 C27 121.9(2) . . ?
C21 C22 C27 121.1(2) . . ?
C24 C23 C22 121.0(2) . . ?
C23 C24 C25 120.8(2) . . ?
C24 C25 C26 120.9(2) . . ?
C25 C26 C21 116.6(2) . . ?
C25 C26 C28 122.82(19) . . ?
C21 C26 C28 120.6(2) . . ?

loop_
 _geom_hbond_atom_site_label_D
 _geom_hbond_atom_site_label_H
 _geom_hbond_atom_site_label_A
 _geom_hbond_distance_DH
 _geom_hbond_distance_HA
 _geom_hbond_distance_DA
 _geom_hbond_angle_DHA
 _geom_hbond_site_symmetry_A
C17 H17B O1  0.98 2.54 3.385(3) 144.0 2_567
C28 H28C O1  0.98 2.60 3.274(3) 125.9 1_564
C18 H18C O2  0.98 2.50 3.442(3) 160.7 2_666
C23 H23 O2  0.95 2.41 3.204(3) 140.6 2_766
C28 H28B O2  0.98 2.51 3.411(3) 153.4 2_666

_diffrn_measured_fraction_theta_max    0.992
_diffrn_reflns_theta_full              30.00
_diffrn_measured_fraction_theta_full   0.992
_refine_diff_density_max    0.824
_refine_diff_density_min   -1.682
_refine_diff_density_rms    0.144

#====END

#===============================================
#cif file for "firsde"  (compound 4a in the manuscript).
#===============================================


data_firsde

_audit_creation_method            SHELXL-97
_chemical_name_systematic
;
 ?
;
_chemical_name_common             ?
_chemical_melting_point           ?
_chemical_formula_moiety          ?
_chemical_formula_sum
 'C20 H35 N3 O2 Pd S2'
_chemical_formula_weight          520.03

loop_
 _atom_type_symbol
 _atom_type_description
 _atom_type_scat_dispersion_real
 _atom_type_scat_dispersion_imag
 _atom_type_scat_source
 'C'  'C'   0.0033   0.0016
 'International Tables Vol C Tables 4.2.6.8 and 6.1.1.4'
 'H'  'H'   0.0000   0.0000
 'International Tables Vol C Tables 4.2.6.8 and 6.1.1.4'
 'N'  'N'   0.0061   0.0033
 'International Tables Vol C Tables 4.2.6.8 and 6.1.1.4'
 'O'  'O'   0.0106   0.0060
 'International Tables Vol C Tables 4.2.6.8 and 6.1.1.4'
 'S'  'S'   0.1246   0.1234
 'International Tables Vol C Tables 4.2.6.8 and 6.1.1.4'
 'Pd'  'Pd'  -0.9988   1.0072
 'International Tables Vol C Tables 4.2.6.8 and 6.1.1.4'

_symmetry_cell_setting            monoclinic
_symmetry_space_group_name_H-M    'P 21/c'

loop_
 _symmetry_equiv_pos_as_xyz
 'x, y, z'
 '-x, y+1/2, -z+1/2'
 '-x, -y, -z'
 'x, -y-1/2, z-1/2'

_cell_length_a                    12.3951(8)
_cell_length_b                    8.6027(6)
_cell_length_c                    22.6438(16)
_cell_angle_alpha                 90.00
_cell_angle_beta                  99.750(3)
_cell_angle_gamma                 90.00
_cell_volume                      2379.7(3)
_cell_formula_units_Z             4
_cell_measurement_temperature     143(2)
_cell_measurement_reflns_used     7892
_cell_measurement_theta_min       2
_cell_measurement_theta_max       28

_exptl_crystal_description        'hexagonal tablet'
_exptl_crystal_colour             'pale yellow'
_exptl_crystal_size_max           0.32
_exptl_crystal_size_mid           0.21
_exptl_crystal_size_min           0.15
_exptl_crystal_density_meas       ?
_exptl_crystal_density_diffrn     1.452
_exptl_crystal_density_method     'not measured'
_exptl_crystal_F_000              1080
_exptl_absorpt_coefficient_mu     0.975
_exptl_absorpt_correction_type    numerical
_exptl_absorpt_correction_T_min  0.7928
_exptl_absorpt_correction_T_max  0.8717
_exptl_absorpt_process_details    XPREP

loop_
 _exptl_crystal_face_index_h
 _exptl_crystal_face_index_k
 _exptl_crystal_face_index_l
 _exptl_crystal_face_perp_dist
    0.00    0.00   -1.00    0.1030
    0.00    0.00    1.00    0.1170
   -1.00    0.00    0.00    0.0700
    1.00    0.00    0.00    0.0870
   -1.00    2.00   -2.00    0.1240
    1.00   -2.00    2.00    0.1450
    1.00   -2.00   -2.00    0.1550
   -1.00    2.00    2.00    0.1250
   -1.00   -2.00    2.00    0.1520
    1.00    2.00   -2.00    0.1300
    1.00    2.00    2.00    0.1420
   -1.00   -2.00   -2.00    0.1700

_exptl_special_details
;
 ?
;

_diffrn_ambient_temperature       143(2)
_diffrn_radiation_wavelength      0.71073
_diffrn_radiation_type            MoK\a
_diffrn_radiation_source          'fine-focus sealed tube'
_diffrn_radiation_monochromator   graphite
_diffrn_measurement_device_type   'Bruker SMART 1000 CCD'
_diffrn_measurement_method        '\w- and \f-scan'
_diffrn_detector_area_resol_mean  8.192
_diffrn_standards_number          ?
_diffrn_standards_interval_count  ?
_diffrn_standards_interval_time   ?
_diffrn_standards_decay_%         ?
_diffrn_reflns_number             49246
_diffrn_reflns_av_R_equivalents   0.0529
_diffrn_reflns_av_sigmaI/netI     0.0238
_diffrn_reflns_limit_h_min        -17
_diffrn_reflns_limit_h_max        17
_diffrn_reflns_limit_k_min        -12
_diffrn_reflns_limit_k_max        12
_diffrn_reflns_limit_l_min        -31
_diffrn_reflns_limit_l_max        31
_diffrn_reflns_theta_min          1.67
_diffrn_reflns_theta_max          30.03
_reflns_number_total              6960
_reflns_number_gt                 6366
_reflns_threshold_expression      >2sigma(I)

_computing_data_collection        'Bruker SMART'
_computing_cell_refinement        'Bruker SAINT'
_computing_data_reduction         'Bruker SAINT'
_computing_structure_solution     'SHELXS-97 (Sheldrick, 1990)'
_computing_structure_refinement   'SHELXL-97 (Sheldrick, 1997)'
_computing_molecular_graphics     'Siemens XP'
_computing_publication_material   SHELXL-97

_refine_special_details
;
 Refinement of F^2^ against ALL reflections.  The weighted R-factor wR and
 goodness of fit S are based on F^2^, conventional R-factors R are based
 on F, with F set to zero for negative F^2^. The threshold expression of
 F^2^ > 2sigma(F^2^) is used only for calculating R-factors(gt) etc. and is
 not relevant to the choice of reflections for refinement.  R-factors based
 on F^2^ are statistically about twice as large as those based on F, and R-
 factors based on ALL data will be even larger.
;

_refine_ls_structure_factor_coef  Fsqd
_refine_ls_matrix_type            full
_refine_ls_weighting_scheme       calc
_refine_ls_weighting_details
 'calc w=1/[\s^2^(Fo^2^)+(0.0263P)^2^+0.6406P] where P=(Fo^2^+2Fc^2^)/3'
_atom_sites_solution_primary      direct
_atom_sites_solution_secondary    difmap
_atom_sites_solution_hydrogens    geom
_refine_ls_hydrogen_treatment     'NH free, rigid methyls, others riding'
_refine_ls_extinction_method      none
_refine_ls_extinction_coef        ?
_refine_ls_number_reflns          6960
_refine_ls_number_parameters      267
_refine_ls_number_restraints      0
_refine_ls_R_factor_all           0.0235
_refine_ls_R_factor_gt            0.0210
_refine_ls_wR_factor_ref          0.0509
_refine_ls_wR_factor_gt           0.0496
_refine_ls_goodness_of_fit_ref    1.051
_refine_ls_restrained_S_all       1.051
_refine_ls_shift/su_max           0.004
_refine_ls_shift/su_mean          0.000

loop_
 _atom_site_label
 _atom_site_type_symbol
 _atom_site_fract_x
 _atom_site_fract_y
 _atom_site_fract_z
 _atom_site_U_iso_or_equiv
 _atom_site_adp_type
 _atom_site_occupancy
 _atom_site_symmetry_multiplicity
 _atom_site_calc_flag
 _atom_site_refinement_flags
 _atom_site_disorder_assembly
 _atom_site_disorder_group
Pd Pd 0.491181(6) 0.281574(10) 0.371052(4) 0.01439(3) Uani 1 1 d . . .
S1 S 0.63045(2) 0.42811(3) 0.341917(13) 0.01819(6) Uani 1 1 d . . .
S2 S 0.65117(2) 0.18579(3) 0.426431(13) 0.01712(6) Uani 1 1 d . . .
N1 N 0.35997(8) -0.00517(12) 0.37069(4) 0.01813(19) Uani 1 1 d . . .
H1 H 0.2905(14) 0.094(2) 0.4546(8) 0.031(5) Uiso 1 1 d . . .
N2 N 0.33156(9) 0.15417(13) 0.44674(5) 0.01909(19) Uani 1 1 d . . .
N3 N 0.29084(8) 0.40708(13) 0.28112(5) 0.0204(2) Uani 1 1 d . . .
O1 O 0.84888(8) 0.47610(12) 0.30669(4) 0.0308(2) Uani 1 1 d . . .
O2 O 1.01338(8) 0.23112(13) 0.42361(5) 0.0337(2) Uani 1 1 d . . .
C1 C 0.72575(9) 0.31731(13) 0.38978(5) 0.0152(2) Uani 1 1 d . . .
C2 C 0.83783(9) 0.33377(14) 0.39610(5) 0.0171(2) Uani 1 1 d . . .
C3 C 0.88386(10) 0.45405(14) 0.35951(6) 0.0205(2) Uani 1 1 d . . .
C4 C 0.97300(11) 0.55904(17) 0.39183(7) 0.0312(3) Uani 1 1 d . . .
H4A H 1.0307 0.5713 0.3674 0.047 Uiso 1 1 calc R . .
H4B H 1.0041 0.5127 0.4305 0.047 Uiso 1 1 calc R . .
H4C H 0.9419 0.6610 0.3984 0.047 Uiso 1 1 calc R . .
C5 C 0.91973(10) 0.24034(15) 0.43492(6) 0.0213(2) Uani 1 1 d . . .
C6 C 0.89352(11) 0.15806(17) 0.48947(6) 0.0276(3) Uani 1 1 d . . .
H6A H 0.8577 0.0587 0.4775 0.033 Uiso 1 1 calc R . .
H6B H 0.8445 0.2229 0.5087 0.033 Uiso 1 1 calc R . .
H6C H 0.9613 0.1390 0.5177 0.033 Uiso 1 1 calc R . .
C7 C 0.38320(9) 0.12840(13) 0.40053(5) 0.0158(2) Uani 1 1 d . . .
C8 C 0.40098(10) -0.04036(15) 0.31462(5) 0.0205(2) Uani 1 1 d . . .
H8A H 0.4363 0.0538 0.3015 0.025 Uiso 1 1 calc R . .
H8B H 0.3381 -0.0667 0.2831 0.025 Uiso 1 1 calc R . .
C9 C 0.48239(12) -0.17327(19) 0.32082(6) 0.0304(3) Uani 1 1 d . . .
H9A H 0.5472 -0.1451 0.3500 0.036 Uiso 1 1 calc R . .
H9B H 0.5039 -0.1941 0.2819 0.036 Uiso 1 1 calc R . .
H9C H 0.4486 -0.2665 0.3346 0.036 Uiso 1 1 calc R . .
C10 C 0.27873(10) -0.11707(14) 0.38543(6) 0.0208(2) Uani 1 1 d . . .
H10A H 0.2868 -0.1272 0.4295 0.025 Uiso 1 1 calc R . .
H10B H 0.2928 -0.2202 0.3689 0.025 Uiso 1 1 calc R . .
C11 C 0.16176(10) -0.06656(16) 0.36019(6) 0.0268(3) Uani 1 1 d . . .
H11A H 0.1457 0.0318 0.3788 0.032 Uiso 1 1 calc R . .
H11B H 0.1103 -0.1465 0.3689 0.032 Uiso 1 1 calc R . .
H11C H 0.1542 -0.0526 0.3167 0.032 Uiso 1 1 calc R . .
C12 C 0.33938(10) 0.28970(14) 0.48834(5) 0.0180(2) Uani 1 1 d . . .
C13 C 0.30121(12) 0.43859(16) 0.45433(6) 0.0270(3) Uani 1 1 d . . .
H13A H 0.3512 0.4637 0.4265 0.032 Uiso 1 1 calc R . .
H13B H 0.3007 0.5241 0.4829 0.032 Uiso 1 1 calc R . .
H13C H 0.2272 0.4234 0.4318 0.032 Uiso 1 1 calc R . .
C14 C 0.45563(10) 0.30553(16) 0.52265(6) 0.0241(3) Uani 1 1 d . . .
H14A H 0.4792 0.2062 0.5418 0.029 Uiso 1 1 calc R . .
H14B H 0.4576 0.3862 0.5534 0.029 Uiso 1 1 calc R . .
H14C H 0.5049 0.3344 0.4949 0.029 Uiso 1 1 calc R . .
C15 C 0.26130(11) 0.25236(16) 0.53212(6) 0.0239(2) Uani 1 1 d . . .
H15A H 0.1866 0.2420 0.5099 0.029 Uiso 1 1 calc R . .
H15B H 0.2638 0.3365 0.5615 0.029 Uiso 1 1 calc R . .
H15C H 0.2836 0.1547 0.5529 0.029 Uiso 1 1 calc R . .
C16 C 0.36621(10) 0.36859(14) 0.31481(5) 0.0193(2) Uani 1 1 d . . .
C17 C 0.18859(9) 0.44271(14) 0.24068(5) 0.0190(2) Uani 1 1 d . . .
C18 C 0.10124(10) 0.33811(17) 0.25970(6) 0.0265(3) Uani 1 1 d . . .
H18A H 0.1192 0.2291 0.2533 0.032 Uiso 1 1 calc R . .
H18B H 0.0298 0.3629 0.2358 0.032 Uiso 1 1 calc R . .
H18C H 0.0986 0.3551 0.3022 0.032 Uiso 1 1 calc R . .
C19 C 0.20638(12) 0.40723(18) 0.17697(6) 0.0282(3) Uani 1 1 d . . .
H19A H 0.2633 0.4760 0.1665 0.034 Uiso 1 1 calc R . .
H19B H 0.1379 0.4242 0.1490 0.034 Uiso 1 1 calc R . .
H19C H 0.2294 0.2987 0.1745 0.034 Uiso 1 1 calc R . .
C20 C 0.16390(13) 0.61472(17) 0.24799(7) 0.0329(3) Uani 1 1 d . . .
H20A H 0.1523 0.6342 0.2891 0.040 Uiso 1 1 calc R . .
H20B H 0.0978 0.6433 0.2199 0.040 Uiso 1 1 calc R . .
H20C H 0.2258 0.6772 0.2397 0.040 Uiso 1 1 calc R . .

loop_
 _atom_site_aniso_label
 _atom_site_aniso_U_11
 _atom_site_aniso_U_22
 _atom_site_aniso_U_33
 _atom_site_aniso_U_23
 _atom_site_aniso_U_13
 _atom_site_aniso_U_12
Pd 0.01175(4) 0.01777(5) 0.01340(5) 0.00115(3) 0.00135(3) -0.00174(3)
S1 0.01521(12) 0.02161(14) 0.01756(13) 0.00504(10) 0.00218(10) -0.00174(10)
S2 0.01357(12) 0.01925(13) 0.01839(13) 0.00402(10) 0.00227(10) -0.00120(10)
N1 0.0189(4) 0.0204(5) 0.0158(4) -0.0024(4) 0.0051(4) -0.0045(4)
N2 0.0201(5) 0.0201(5) 0.0182(5) -0.0042(4) 0.0064(4) -0.0076(4)
N3 0.0177(5) 0.0236(5) 0.0192(5) 0.0021(4) 0.0016(4) -0.0002(4)
O1 0.0306(5) 0.0339(5) 0.0284(5) 0.0077(4) 0.0067(4) -0.0079(4)
O2 0.0185(4) 0.0389(6) 0.0450(6) 0.0071(5) 0.0086(4) 0.0070(4)
C1 0.0167(5) 0.0152(5) 0.0140(5) -0.0013(4) 0.0039(4) -0.0011(4)
C2 0.0153(5) 0.0171(5) 0.0192(5) -0.0001(4) 0.0038(4) -0.0016(4)
C3 0.0157(5) 0.0189(5) 0.0283(6) -0.0003(4) 0.0079(4) -0.0012(4)
C4 0.0239(6) 0.0272(7) 0.0424(8) -0.0003(6) 0.0057(6) -0.0103(5)
C5 0.0165(5) 0.0206(5) 0.0261(6) -0.0010(4) 0.0019(4) -0.0004(4)
C6 0.0195(6) 0.0315(7) 0.0298(7) 0.0093(5) -0.0015(5) -0.0002(5)
C7 0.0130(4) 0.0196(5) 0.0142(5) 0.0003(4) 0.0004(4) -0.0006(4)
C8 0.0239(6) 0.0234(6) 0.0148(5) -0.0035(4) 0.0051(4) -0.0029(5)
C9 0.0297(7) 0.0388(8) 0.0242(6) -0.0014(6) 0.0088(5) 0.0083(6)
C10 0.0225(5) 0.0196(5) 0.0213(6) -0.0034(4) 0.0062(4) -0.0064(4)
C11 0.0209(6) 0.0296(7) 0.0297(7) -0.0050(5) 0.0040(5) -0.0078(5)
C12 0.0181(5) 0.0193(5) 0.0172(5) -0.0040(4) 0.0042(4) -0.0038(4)
C13 0.0325(7) 0.0223(6) 0.0259(6) -0.0008(5) 0.0042(5) -0.0002(5)
C14 0.0197(6) 0.0307(7) 0.0216(6) -0.0073(5) 0.0025(5) -0.0046(5)
C15 0.0242(6) 0.0261(6) 0.0236(6) -0.0062(5) 0.0107(5) -0.0052(5)
C16 0.0170(5) 0.0221(6) 0.0195(5) 0.0011(4) 0.0048(4) -0.0025(4)
C17 0.0155(5) 0.0203(5) 0.0197(5) 0.0009(4) -0.0017(4) 0.0027(4)
C18 0.0184(5) 0.0313(7) 0.0296(7) 0.0011(5) 0.0032(5) -0.0016(5)
C19 0.0311(7) 0.0340(7) 0.0188(6) 0.0017(5) 0.0021(5) 0.0004(6)
C20 0.0361(8) 0.0224(6) 0.0380(8) -0.0011(6) -0.0006(6) 0.0073(6)

_geom_special_details
;
 All esds (except the esd in the dihedral angle between two l.s. planes)
 are estimated using the full covariance matrix.  The cell esds are taken
 into account individually in the estimation of esds in distances, angles
 and torsion angles; correlations between esds in cell parameters are only
 used when they are defined by crystal symmetry.  An approximate (isotropic)
 treatment of cell esds is used for estimating esds involving l.s. planes.
;

loop_
 _geom_bond_atom_site_label_1
 _geom_bond_atom_site_label_2
 _geom_bond_distance
 _geom_bond_site_symmetry_2
 _geom_bond_publ_flag
Pd C16 1.9783(12) . ?
Pd C7 2.0679(11) . ?
Pd S2 2.3112(3) . ?
Pd S1 2.3216(3) . ?
S1 C1 1.7450(12) . ?
S2 C1 1.7560(12) . ?
N1 C7 1.3394(15) . ?
N1 C10 1.4717(15) . ?
N1 C8 1.4767(15) . ?
N2 C7 1.3342(15) . ?
N2 C12 1.4918(15) . ?
N3 C16 1.1502(16) . ?
N3 C17 1.4648(15) . ?
O1 C3 1.2159(16) . ?
O2 C5 1.2330(16) . ?
C1 C2 1.3796(15) . ?
C2 C5 1.4653(17) . ?
C2 C3 1.4976(16) . ?
C3 C4 1.5160(18) . ?
C5 C6 1.5061(19) . ?
C8 C9 1.5156(19) . ?
C10 C11 1.5286(18) . ?
C12 C14 1.5229(17) . ?
C12 C13 1.5278(18) . ?
C12 C15 1.5321(17) . ?
C17 C18 1.5248(18) . ?
C17 C20 1.5257(18) . ?
C17 C19 1.5267(18) . ?

loop_
 _geom_angle_atom_site_label_1
 _geom_angle_atom_site_label_2
 _geom_angle_atom_site_label_3
 _geom_angle
 _geom_angle_site_symmetry_1
 _geom_angle_site_symmetry_3
 _geom_angle_publ_flag
C16 Pd C7 88.27(5) . . ?
C16 Pd S2 172.12(3) . . ?
C7 Pd S2 98.08(3) . . ?
C16 Pd S1 98.65(3) . . ?
C7 Pd S1 172.23(3) . . ?
S2 Pd S1 74.741(11) . . ?
C1 S1 Pd 89.12(4) . . ?
C1 S2 Pd 89.19(4) . . ?
C7 N1 C10 122.93(10) . . ?
C7 N1 C8 122.26(10) . . ?
C10 N1 C8 114.16(9) . . ?
C7 N2 C12 129.54(10) . . ?
C16 N3 C17 173.95(12) . . ?
C2 C1 S1 124.91(9) . . ?
C2 C1 S2 128.22(9) . . ?
S1 C1 S2 106.87(6) . . ?
C1 C2 C5 126.09(11) . . ?
C1 C2 C3 119.00(10) . . ?
C5 C2 C3 114.89(10) . . ?
O1 C3 C2 123.10(11) . . ?
O1 C3 C4 119.42(12) . . ?
C2 C3 C4 117.34(11) . . ?
O2 C5 C2 119.44(12) . . ?
O2 C5 C6 118.80(12) . . ?
C2 C5 C6 121.74(11) . . ?
N2 C7 N1 116.59(10) . . ?
N2 C7 Pd 124.75(9) . . ?
N1 C7 Pd 118.64(8) . . ?
N1 C8 C9 113.31(10) . . ?
N1 C10 C11 111.80(11) . . ?
N2 C12 C14 110.29(10) . . ?
N2 C12 C13 110.82(10) . . ?
C14 C12 C13 111.57(10) . . ?
N2 C12 C15 105.31(9) . . ?
C14 C12 C15 109.60(10) . . ?
C13 C12 C15 109.04(11) . . ?
N3 C16 Pd 174.49(11) . . ?
N3 C17 C18 106.29(10) . . ?
N3 C17 C20 107.66(10) . . ?
C18 C17 C20 112.13(11) . . ?
N3 C17 C19 107.50(10) . . ?
C18 C17 C19 111.84(11) . . ?
C20 C17 C19 111.11(11) . . ?

_diffrn_measured_fraction_theta_max    1.000
_diffrn_reflns_theta_full              30.00
_diffrn_measured_fraction_theta_full   1.000
_refine_diff_density_max    0.488
_refine_diff_density_min   -0.765
_refine_diff_density_rms    0.072

#====END

#===============================================
#cif file for "shufti"  (compound 4b in the manuscript).
#===============================================


data_shufti

_audit_creation_method            SHELXL-97
_chemical_name_systematic
;
 ?
;
_chemical_name_common             ?
_chemical_melting_point           ?
_chemical_formula_moiety          ?
_chemical_formula_sum
 'C20 H35 N3 O2 Pt S2'
_chemical_formula_weight          608.72

loop_
 _atom_type_symbol
 _atom_type_description
 _atom_type_scat_dispersion_real
 _atom_type_scat_dispersion_imag
 _atom_type_scat_source
 'C'  'C'   0.0033   0.0016
 'International Tables Vol C Tables 4.2.6.8 and 6.1.1.4'
 'H'  'H'   0.0000   0.0000
 'International Tables Vol C Tables 4.2.6.8 and 6.1.1.4'
 'N'  'N'   0.0061   0.0033
 'International Tables Vol C Tables 4.2.6.8 and 6.1.1.4'
 'O'  'O'   0.0106   0.0060
 'International Tables Vol C Tables 4.2.6.8 and 6.1.1.4'
 'S'  'S'   0.1246   0.1234
 'International Tables Vol C Tables 4.2.6.8 and 6.1.1.4'
 'Pt'  'Pt'  -1.7033   8.3905
 'International Tables Vol C Tables 4.2.6.8 and 6.1.1.4'

_symmetry_cell_setting            monoclinic
_symmetry_space_group_name_H-M    'P 21/c'

loop_
 _symmetry_equiv_pos_as_xyz
 'x, y, z'
 '-x, y+1/2, -z+1/2'
 '-x, -y, -z'
 'x, -y-1/2, z-1/2'

_cell_length_a                    12.3844(8)
_cell_length_b                    8.6170(6)
_cell_length_c                    22.6190(14)
_cell_angle_alpha                 90.00
_cell_angle_beta                  99.858(3)
_cell_angle_gamma                 90.00
_cell_volume                      2378.2(3)
_cell_formula_units_Z             4
_cell_measurement_temperature     143(2)
_cell_measurement_reflns_used     6515
_cell_measurement_theta_min       2
_cell_measurement_theta_max       28

_exptl_crystal_description        tablet
_exptl_crystal_colour             'pale yellow'
_exptl_crystal_size_max           0.16
_exptl_crystal_size_mid           0.15
_exptl_crystal_size_min           0.10
_exptl_crystal_density_meas       ?
_exptl_crystal_density_diffrn     1.700
_exptl_crystal_density_method     'not measured'
_exptl_crystal_F_000              1208
_exptl_absorpt_coefficient_mu     6.095
_exptl_absorpt_correction_type    numerical
_exptl_absorpt_correction_T_min  0.3356
_exptl_absorpt_correction_T_max  0.5274
_exptl_absorpt_process_details    XPREP


loop_
 _exptl_crystal_face_index_h
 _exptl_crystal_face_index_k
 _exptl_crystal_face_index_l
 _exptl_crystal_face_perp_dist
   -1.00    0.00    0.00    0.0770
    1.00    0.00    0.00    0.0770
    0.00   -1.00    2.00    0.0550
    0.00    1.00   -2.00    0.0690
    0.00   -1.00   -2.00    0.1100
    0.00    1.00    2.00    0.0830
    0.00    0.00   -1.00    0.0940

_exptl_special_details
;
 ?
;

_diffrn_ambient_temperature       143(2)
_diffrn_radiation_wavelength      0.71073
_diffrn_radiation_type            MoK\a
_diffrn_radiation_source          'fine-focus sealed tube'
_diffrn_radiation_monochromator   graphite
_diffrn_measurement_device_type   'Bruker SMART 1000 CCD'
_diffrn_measurement_method        '\w- and \f-scans'
_diffrn_detector_area_resol_mean  8.192
_diffrn_standards_number          ?
_diffrn_standards_interval_count  ?
_diffrn_standards_interval_time   ?
_diffrn_standards_decay_%         ?
_diffrn_reflns_number             48996
_diffrn_reflns_av_R_equivalents   0.0634
_diffrn_reflns_av_sigmaI/netI     0.0310
_diffrn_reflns_limit_h_min        -17
_diffrn_reflns_limit_h_max        17
_diffrn_reflns_limit_k_min        -12
_diffrn_reflns_limit_k_max        12
_diffrn_reflns_limit_l_min        -31
_diffrn_reflns_limit_l_max        31
_diffrn_reflns_theta_min          1.67
_diffrn_reflns_theta_max          30.03
_reflns_number_total              6958
_reflns_number_gt                 6106
_reflns_threshold_expression      >2sigma(I)

_computing_data_collection        'Bruker SMART'
_computing_cell_refinement        'Bruker SAINT'
_computing_data_reduction         'Bruker SAINT'
_computing_structure_solution     'SHELXS-97 (Sheldrick, 1990)'
_computing_structure_refinement   'SHELXL-97 (Sheldrick, 1997)'
_computing_molecular_graphics     'Siemens XP'
_computing_publication_material   SHELXL-97

_refine_special_details
;
 Refinement of F^2^ against ALL reflections.  The weighted R-factor wR and
 goodness of fit S are based on F^2^, conventional R-factors R are based
 on F, with F set to zero for negative F^2^. The threshold expression of
 F^2^ > 2sigma(F^2^) is used only for calculating R-factors(gt) etc. and is
 not relevant to the choice of reflections for refinement.  R-factors based
 on F^2^ are statistically about twice as large as those based on F, and R-
 factors based on ALL data will be even larger.
;

_refine_ls_structure_factor_coef  Fsqd
_refine_ls_matrix_type            full
_refine_ls_weighting_scheme       calc
_refine_ls_weighting_details
 'calc w=1/[\s^2^(Fo^2^)+(0.0234P)^2^] where P=(Fo^2^+2Fc^2^)/3'
_atom_sites_solution_primary      'isostructural to Pd analogue'
_atom_sites_solution_secondary    difmap
_atom_sites_solution_hydrogens    geom
_refine_ls_hydrogen_treatment     'NH free, rigid methyls, others riding'
_refine_ls_extinction_method      none
_refine_ls_extinction_coef        ?
_refine_ls_number_reflns          6958
_refine_ls_number_parameters      267
_refine_ls_number_restraints      0
_refine_ls_R_factor_all           0.0253
_refine_ls_R_factor_gt            0.0205
_refine_ls_wR_factor_ref          0.0437
_refine_ls_wR_factor_gt           0.0425
_refine_ls_goodness_of_fit_ref    0.999
_refine_ls_restrained_S_all       0.999
_refine_ls_shift/su_max           0.006
_refine_ls_shift/su_mean          0.000

loop_
 _atom_site_label
 _atom_site_type_symbol
 _atom_site_fract_x
 _atom_site_fract_y
 _atom_site_fract_z
 _atom_site_U_iso_or_equiv
 _atom_site_adp_type
 _atom_site_occupancy
 _atom_site_symmetry_multiplicity
 _atom_site_calc_flag
 _atom_site_refinement_flags
 _atom_site_disorder_assembly
 _atom_site_disorder_group
Pt Pt 0.490287(6) 0.280692(9) 0.370120(3) 0.01341(3) Uani 1 1 d . . .
S1 S 0.63050(4) 0.42876(6) 0.34159(2) 0.01680(10) Uani 1 1 d . . .
S2 S 0.65146(4) 0.18628(6) 0.42616(2) 0.01612(10) Uani 1 1 d . . .
N1 N 0.35906(14) -0.0060(2) 0.37042(8) 0.0169(3) Uani 1 1 d . . .
N2 N 0.33232(15) 0.1556(2) 0.44603(8) 0.0185(4) Uani 1 1 d . . .
H2 H 0.287(2) 0.093(3) 0.4530(11) 0.019(6) Uiso 1 1 d . . .
N3 N 0.29272(14) 0.4078(2) 0.28182(8) 0.0194(4) Uani 1 1 d . . .
O1 O 0.84974(13) 0.4769(2) 0.30659(7) 0.0297(4) Uani 1 1 d . . .
O2 O 1.01417(14) 0.2342(2) 0.42376(9) 0.0322(4) Uani 1 1 d . . .
C1 C 0.72619(17) 0.3180(2) 0.38961(9) 0.0145(4) Uani 1 1 d . . .
C2 C 0.83849(16) 0.3352(2) 0.39595(9) 0.0163(4) Uani 1 1 d . . .
C3 C 0.88418(17) 0.4557(2) 0.35935(10) 0.0200(4) Uani 1 1 d . . .
C4 C 0.97293(19) 0.5605(3) 0.39203(12) 0.0299(5) Uani 1 1 d . . .
H4A H 1.0312 0.5723 0.3680 0.036 Uiso 1 1 calc R . .
H4B H 1.0034 0.5146 0.4310 0.036 Uiso 1 1 calc R . .
H4C H 0.9417 0.6625 0.3983 0.036 Uiso 1 1 calc R . .
C5 C 0.92027(17) 0.2417(3) 0.43469(10) 0.0199(4) Uani 1 1 d . . .
C6 C 0.89404(18) 0.1582(3) 0.48899(11) 0.0268(5) Uani 1 1 d . . .
H6A H 0.8571 0.0600 0.4765 0.032 Uiso 1 1 calc R . .
H6B H 0.8459 0.2231 0.5088 0.032 Uiso 1 1 calc R . .
H6C H 0.9621 0.1373 0.5170 0.032 Uiso 1 1 calc R . .
C7 C 0.38319(15) 0.1290(2) 0.39957(9) 0.0148(4) Uani 1 1 d . . .
C8 C 0.39882(17) -0.0444(3) 0.31405(9) 0.0187(4) Uani 1 1 d . . .
H8A H 0.4331 0.0490 0.2997 0.022 Uiso 1 1 calc R . .
H8B H 0.3354 -0.0731 0.2831 0.022 Uiso 1 1 calc R . .
C9 C 0.4808(2) -0.1756(3) 0.32094(11) 0.0295(5) Uani 1 1 d . . .
H9A H 0.5468 -0.1445 0.3489 0.035 Uiso 1 1 calc R . .
H9B H 0.5004 -0.2000 0.2818 0.035 Uiso 1 1 calc R . .
H9C H 0.4486 -0.2674 0.3366 0.035 Uiso 1 1 calc R . .
C10 C 0.27797(17) -0.1156(3) 0.38599(9) 0.0190(4) Uani 1 1 d . . .
H10A H 0.2868 -0.1239 0.4302 0.023 Uiso 1 1 calc R . .
H10B H 0.2916 -0.2194 0.3700 0.023 Uiso 1 1 calc R . .
C11 C 0.16090(18) -0.0663(3) 0.36109(11) 0.0254(5) Uani 1 1 d . . .
H11A H 0.1449 0.0321 0.3795 0.030 Uiso 1 1 calc R . .
H11B H 0.1099 -0.1462 0.3702 0.030 Uiso 1 1 calc R . .
H11C H 0.1526 -0.0530 0.3175 0.030 Uiso 1 1 calc R . .
C12 C 0.33961(17) 0.2902(2) 0.48806(10) 0.0179(4) Uani 1 1 d . . .
C13 C 0.29967(19) 0.4392(3) 0.45466(11) 0.0252(5) Uani 1 1 d . . .
H13A H 0.3514 0.4695 0.4285 0.030 Uiso 1 1 calc R . .
H13B H 0.2947 0.5221 0.4837 0.030 Uiso 1 1 calc R . .
H13C H 0.2273 0.4214 0.4304 0.030 Uiso 1 1 calc R . .
C14 C 0.45595(18) 0.3072(3) 0.52229(10) 0.0227(5) Uani 1 1 d . . .
H14A H 0.4806 0.2078 0.5410 0.027 Uiso 1 1 calc R . .
H14B H 0.4575 0.3865 0.5535 0.027 Uiso 1 1 calc R . .
H14C H 0.5047 0.3382 0.4945 0.027 Uiso 1 1 calc R . .
C15 C 0.26205(19) 0.2507(3) 0.53173(10) 0.0224(5) Uani 1 1 d . . .
H15A H 0.1874 0.2387 0.5095 0.027 Uiso 1 1 calc R . .
H15B H 0.2636 0.3344 0.5612 0.027 Uiso 1 1 calc R . .
H15C H 0.2855 0.1535 0.5525 0.027 Uiso 1 1 calc R . .
C16 C 0.36755(17) 0.3662(2) 0.31525(9) 0.0178(4) Uani 1 1 d . . .
C17 C 0.19020(17) 0.4433(2) 0.24152(9) 0.0185(4) Uani 1 1 d . . .
C18 C 0.10251(18) 0.3387(3) 0.26057(11) 0.0260(5) Uani 1 1 d . . .
H18A H 0.1207 0.2299 0.2545 0.031 Uiso 1 1 calc R . .
H18B H 0.0311 0.3631 0.2364 0.031 Uiso 1 1 calc R . .
H18C H 0.0996 0.3563 0.3031 0.031 Uiso 1 1 calc R . .
C19 C 0.2075(2) 0.4083(3) 0.17761(10) 0.0279(5) Uani 1 1 d . . .
H19A H 0.2625 0.4795 0.1666 0.033 Uiso 1 1 calc R . .
H19B H 0.1382 0.4218 0.1499 0.033 Uiso 1 1 calc R . .
H19C H 0.2330 0.3011 0.1754 0.033 Uiso 1 1 calc R . .
C20 C 0.1655(2) 0.6152(3) 0.24871(12) 0.0321(6) Uani 1 1 d . . .
H20A H 0.1563 0.6355 0.2902 0.039 Uiso 1 1 calc R . .
H20B H 0.0980 0.6428 0.2214 0.039 Uiso 1 1 calc R . .
H20C H 0.2264 0.6776 0.2391 0.039 Uiso 1 1 calc R . .

loop_
 _atom_site_aniso_label
 _atom_site_aniso_U_11
 _atom_site_aniso_U_22
 _atom_site_aniso_U_33
 _atom_site_aniso_U_23
 _atom_site_aniso_U_13
 _atom_site_aniso_U_12
Pt 0.01089(4) 0.01647(4) 0.01272(4) 0.00085(3) 0.00159(3) -0.00159(3)
S1 0.0138(2) 0.0199(3) 0.0166(2) 0.00462(19) 0.00226(18) -0.00157(18)
S2 0.0123(2) 0.0179(2) 0.0181(2) 0.00404(18) 0.00242(18) -0.00128(17)
N1 0.0165(8) 0.0190(9) 0.0158(8) -0.0029(7) 0.0047(7) -0.0047(7)
N2 0.0189(8) 0.0188(9) 0.0194(9) -0.0048(7) 0.0077(7) -0.0076(7)
N3 0.0156(8) 0.0233(10) 0.0189(8) 0.0029(7) 0.0017(7) -0.0013(7)
O1 0.0291(9) 0.0340(10) 0.0269(9) 0.0095(7) 0.0073(7) -0.0075(7)
O2 0.0172(8) 0.0373(10) 0.0435(11) 0.0083(8) 0.0089(8) 0.0065(7)
C1 0.0169(9) 0.0142(9) 0.0129(9) -0.0018(7) 0.0043(7) -0.0015(7)
C2 0.0148(9) 0.0151(9) 0.0193(9) -0.0004(8) 0.0036(8) -0.0012(8)
C3 0.0149(9) 0.0178(10) 0.0294(11) -0.0009(9) 0.0095(8) 0.0000(8)
C4 0.0240(11) 0.0258(13) 0.0403(14) -0.0013(11) 0.0065(10) -0.0101(10)
C5 0.0155(9) 0.0174(10) 0.0260(11) -0.0011(8) 0.0012(9) -0.0014(8)
C6 0.0188(10) 0.0298(13) 0.0293(12) 0.0091(10) -0.0028(9) -0.0012(9)
C7 0.0109(8) 0.0180(10) 0.0144(9) 0.0006(7) -0.0009(7) 0.0004(7)
C8 0.0226(10) 0.0201(10) 0.0143(9) -0.0028(8) 0.0057(8) -0.0034(8)
C9 0.0291(12) 0.0376(14) 0.0234(12) -0.0003(10) 0.0092(10) 0.0091(10)
C10 0.0198(10) 0.0183(10) 0.0195(10) -0.0027(8) 0.0044(8) -0.0063(8)
C11 0.0196(10) 0.0283(12) 0.0282(11) -0.0053(10) 0.0037(9) -0.0067(9)
C12 0.0172(9) 0.0199(11) 0.0176(10) -0.0045(8) 0.0056(8) -0.0030(8)
C13 0.0276(11) 0.0222(12) 0.0256(11) 0.0000(9) 0.0041(9) 0.0003(9)
C14 0.0190(10) 0.0287(13) 0.0204(10) -0.0068(9) 0.0035(9) -0.0041(8)
C15 0.0231(11) 0.0224(12) 0.0238(11) -0.0064(9) 0.0095(9) -0.0052(9)
C16 0.0174(9) 0.0194(11) 0.0176(9) 0.0007(8) 0.0053(8) -0.0038(8)
C17 0.0152(9) 0.0189(10) 0.0195(10) 0.0025(8) -0.0024(8) 0.0017(8)
C18 0.0182(10) 0.0307(13) 0.0283(12) 0.0004(10) 0.0023(9) -0.0033(9)
C19 0.0293(12) 0.0356(14) 0.0178(10) 0.0010(9) 0.0016(9) 0.0002(10)
C20 0.0336(13) 0.0223(12) 0.0379(14) -0.0020(10) -0.0014(11) 0.0044(10)

_geom_special_details
;
 All esds (except the esd in the dihedral angle between two l.s. planes)
 are estimated using the full covariance matrix.  The cell esds are taken
 into account individually in the estimation of esds in distances, angles
 and torsion angles; correlations between esds in cell parameters are only
 used when they are defined by crystal symmetry.  An approximate (isotropic)
 treatment of cell esds is used for estimating esds involving l.s. planes.
;

loop_
 _geom_bond_atom_site_label_1
 _geom_bond_atom_site_label_2
 _geom_bond_distance
 _geom_bond_site_symmetry_2
 _geom_bond_publ_flag
Pt C16 1.936(2) . ?
Pt C7 2.053(2) . ?
Pt S2 2.3208(5) . ?
Pt S1 2.3331(5) . ?
S1 C1 1.748(2) . ?
S2 C1 1.758(2) . ?
N1 C7 1.345(3) . ?
N1 C10 1.465(3) . ?
N1 C8 1.481(2) . ?
N2 C7 1.334(3) . ?
N2 C12 1.492(3) . ?
N3 C16 1.148(3) . ?
N3 C17 1.463(3) . ?
O1 C3 1.210(3) . ?
O2 C5 1.231(3) . ?
C1 C2 1.381(3) . ?
C2 C5 1.463(3) . ?
C2 C3 1.498(3) . ?
C3 C4 1.514(3) . ?
C5 C6 1.506(3) . ?
C8 C9 1.510(3) . ?
C10 C11 1.523(3) . ?
C12 C14 1.521(3) . ?
C12 C13 1.528(3) . ?
C12 C15 1.529(3) . ?
C17 C20 1.527(3) . ?
C17 C19 1.527(3) . ?
C17 C18 1.529(3) . ?

loop_
 _geom_angle_atom_site_label_1
 _geom_angle_atom_site_label_2
 _geom_angle_atom_site_label_3
 _geom_angle
 _geom_angle_site_symmetry_1
 _geom_angle_site_symmetry_3
 _geom_angle_publ_flag
C16 Pt C7 88.31(8) . . ?
C16 Pt S2 172.31(6) . . ?
C7 Pt S2 98.20(5) . . ?
C16 Pt S1 98.88(6) . . ?
C7 Pt S1 172.22(6) . . ?
S2 Pt S1 74.427(18) . . ?
C1 S1 Pt 89.26(7) . . ?
C1 S2 Pt 89.41(7) . . ?
C7 N1 C10 122.93(17) . . ?
C7 N1 C8 122.45(17) . . ?
C10 N1 C8 113.93(16) . . ?
C7 N2 C12 130.54(18) . . ?
C16 N3 C17 172.7(2) . . ?
C2 C1 S1 124.71(16) . . ?
C2 C1 S2 128.48(16) . . ?
S1 C1 S2 106.81(11) . . ?
C1 C2 C5 125.78(19) . . ?
C1 C2 C3 119.07(18) . . ?
C5 C2 C3 115.13(18) . . ?
O1 C3 C2 123.1(2) . . ?
O1 C3 C4 119.7(2) . . ?
C2 C3 C4 117.07(19) . . ?
O2 C5 C2 119.3(2) . . ?
O2 C5 C6 118.8(2) . . ?
C2 C5 C6 121.85(19) . . ?
N2 C7 N1 116.06(18) . . ?
N2 C7 Pt 124.37(15) . . ?
N1 C7 Pt 119.55(14) . . ?
N1 C8 C9 113.29(18) . . ?
N1 C10 C11 112.32(18) . . ?
N2 C12 C14 110.35(17) . . ?
N2 C12 C13 111.01(19) . . ?
C14 C12 C13 111.66(18) . . ?
N2 C12 C15 105.18(17) . . ?
C14 C12 C15 109.72(18) . . ?
C13 C12 C15 108.70(18) . . ?
N3 C16 Pt 175.79(19) . . ?
N3 C17 C20 107.77(18) . . ?
N3 C17 C19 107.50(17) . . ?
C20 C17 C19 110.84(19) . . ?
N3 C17 C18 106.47(17) . . ?
C20 C17 C18 112.14(19) . . ?
C19 C17 C18 111.84(19) . . ?

_diffrn_measured_fraction_theta_max    0.999
_diffrn_reflns_theta_full              30.00
_diffrn_measured_fraction_theta_full   0.999
_refine_diff_density_max    0.966
_refine_diff_density_min   -1.490
_refine_diff_density_rms    0.122


#===================
#end of file
#===================
